# Supplementary material for: Ischemic Preconditioning Confers Epigenetic Repression of Mtor and Induction of Autophagy Through G9a‐Dependent H3K9 Dimethylation
Source: PubMed Central journal article supplement — J Am Heart Assoc. 2016 Dec 22;5(12):e004076. doi: 10.1161/JAHA.116.004076 (PMC5210409; doi:10.1161/jaha.116.004076), 2016-12-22

## Supplemental Material

Table S1. ChIP-Seq read statistics

| Sample ID      | Total reads | Mapped reads | Alignment percentage |
|----------------|-------------|--------------|----------------------|
| 17 AAR H3K9Me2 | 46,464,760  | 43,314,561   | 93.22%               |
| 17 RM H3K9Me2  | 42,529,152  | 36,486,851   | 85.79%               |
| 19 AAR H3K9Me2 | 46,432,758  | 41,453,073   | 89.28%               |
| 19 RM H3K9Me2  | 47,421,330  | 39,779,990   | 83.89%               |
| 22 AAR H3K9Me2 | 27,843,170  | 25,093,645   | 90.12%               |
| 22 RM H3K9Me2  | 30,375,422  | 26,930,741   | 88.66%               |
| 23 AAR H3K9Me2 | 55,683,060  | 48,354,090   | 86.84%               |
| 23 RM H3K9Me2  | 53,956,742  | 48,575,121   | 90.03%               |
| 27 AAR H3K9Me2 | 56,970,418  | 50,556,075   | 88.74%               |
| 27 RM H3K9Me2  | 46,226,168  | 42,043,416   | 90.95%               |
| 30 AAR H3K9Me2 | 37,993,234  | 33,554,321   | 88.32%               |
| 30 RM H3K9Me2  | 54,274,792  | 48,180,580   | 88.77%               |
| 17 AAR Input   | 54,830,472  | 51,482,772   | 93.89%               |
| 17 RM Input    | 53,865,358  | 46,884,016   | 87.04%               |
| 19 AAR Input   | 59,934,412  | 53,550,931   | 89.35%               |
| 19 RM Input    | 59,816,972  | 53,550,004   | 89.52%               |
| 22 AAR Input   | 56,815,734  | 52,596,352   | 92.57%               |
| 22 RM Input    | 71,595,832  | 65,616,757   | 91.65%               |
| 23 AAR Input   | 71,275,420  | 62,669,043   | 87.93%               |
| 23 RM Input    | 71,239,678  | 64,876,583   | 91.07%               |
| 27 AAR Input   | 61,597,486  | 55,704,829   | 90.43%               |
| 27 RM Input    | 52,275,432  | 49,100,216   | 93.93%               |
| 30 AAR Input   | 59,142,706  | 54,035,048   | 91.36%               |
| 30 RM Input    | 57,672,304  | 53,114,715   | 92.10%               |

Table S2. List of significantly downregulated genes in AAR enriched in H3K9me2.

| <b>Gene symbol</b> | <b>p-value</b> | <b>Fold change (downregulated)</b> |
|--------------------|----------------|------------------------------------|
| 2310067B10Rik      | 0,002480138    | 102,1654158                        |
| 2810006K23Rik      | 0,00162463     | 10,57328448                        |
| 3110002H16Rik      | 0,001412289    | 13,20571078                        |
| Aagab              | 0,001634436    | 16,78780261                        |
| Abce1              | 0,000169836    | 21,58335747                        |
| Acad11             | 0,000771312    | 48,93304818                        |
| Acadm              | 0,00012548     | 14,58513162                        |
| Acbd3              | 0,002421549    | 19,62370165                        |
| Acs1               | 0,001771233    | 28,41238432                        |
| Acss2              | 0,000169588    | 34,7633871                         |
| Actn2              | 0,000434284    | 40,40323063                        |
| Actn4              | 0,000465074    | 10,14473799                        |
| Adck3              | 0,001925546    | 12,84473481                        |
| Adipor1            | 0,000186977    | 12,20307223                        |
| Afg3l2             | 6,39407E-05    | 10,54513383                        |
| Agk                | 0,000655525    | 13,70673736                        |
| Aldh4a1            | 0,000356014    | 16,59000252                        |
| Aldh6a1            | 0,00047691     | 11,37147505                        |
| Ank                | 0,000332791    | 14,38589675                        |
| Ankrd46            | 0,003093555    | 11,58600068                        |
| Apbb2              | 0,003125797    | 20,78966059                        |
| Aplp2              | 0,000122655    | 81,78046438                        |
| App                | 0,000243482    | 19,56518369                        |
| Arfp1              | 0,000851222    | 21,22537665                        |
| Arhgap5            | 0,001418133    | 11,93718286                        |
| Asb8               | 0,001300531    | 18,96999311                        |
| Ascc3              | 0,000241057    | 12,84401188                        |
| Asph               | 0,00397376     | 27,0292898                         |
| Atp1a1             | 0,000213355    | 18,81625224                        |
| Atp6v0a1           | 0,001555441    | 12,75132844                        |
| Azin1              | 0,010354842    | 11,0444908                         |
| Bcam               | 0,00049915     | 29,83549277                        |
| Birc6              | 0,014263687    | 10,06915002                        |
| Bmpr1a             | 0,001808977    | 12,23449629                        |
| Cab39              | 0,003642909    | 13,12810793                        |
| Calm3              | 0,001242676    | 235,197954                         |
| Camta1             | 0,002100626    | 11,39364851                        |
| Caprin1            | 0,001322025    | 12,29649847                        |
| Cat                | 0,000254316    | 84,60125736                        |
| Cbfb               | 0,000508865    | 12,57479957                        |
| Cct6a              | 0,001527757    | 42,11884589                        |

|         |             |             |
|---------|-------------|-------------|
| Cd164   | 0,001167193 | 11,34085299 |
| Cdh2    | 0,000908897 | 17,72072593 |
| Cdkn2c  | 0,000225008 | 12,2466754  |
| Cecr5   | 0,00014144  | 20,72752709 |
| Celf2   | 3,98137E-05 | 18,90688779 |
| Cfl2    | 0,000151221 | 10,96141013 |
| Cmya5   | 0,001165487 | 67,06427289 |
| Cnst    | 0,000124327 | 11,74842902 |
| Cog6    | 0,000172356 | 37,40364985 |
| Coro6   | 0,000733336 | 11,02687052 |
| Crat    | 0,001932849 | 56,28154782 |
| Crhr2   | 0,000201616 | 13,19971935 |
| Ctbp2   | 0,00599797  | 13,88894729 |
| Ctnna1  | 0,001326885 | 5,216371792 |
| Ctps    | 0,002562779 | 12,75537757 |
| Cttn    | 0,005662566 | 10,81261671 |
| Cul4a   | 0,006352797 | 24,7262397  |
| Decr2   | 0,004211541 | 13,92199445 |
| Dek     | 0,000412358 | 43,1205926  |
| Dennd5a | 0,000721373 | 22,80127905 |
| Dhx32   | 0,003290187 | 19,54859003 |
| Dhx40   | 0,000391409 | 10,64299511 |
| Dlg1    | 0,0006463   | 18,39358257 |
| Dpf2    | 0,000356996 | 21,300258   |
| E2f6    | 4,55846E-06 | 42,75022921 |
| Ece1    | 0,006211245 | 10,42712303 |
| Eef2    | 1,82376E-05 | 85,87443221 |
| Ehd4    | 0,001479994 | 46,15259939 |
| Eif3c   | 0,002223805 | 24,96775585 |
| Eif4g2  | 0,000263924 | 44,47364205 |
| Eif4h   | 0,002347282 | 20,9419532  |
| Eif5    | 4,85775E-05 | 18,24890444 |
| Eif5a   | 0,000122737 | 68,24691843 |
| Elp3    | 0,001337693 | 11,6096156  |
| Epc2    | 0,000995765 | 12,76577305 |
| Eral1   | 0,000478964 | 18,39878317 |
| Etf1    | 2,94653E-05 | 11,46065663 |
| Exoc7   | 0,000472115 | 13,67825182 |
| Fam134b | 0,001951167 | 59,87939957 |
| Fam20b  | 0,00095375  | 10,82778507 |
| Fbxo32  | 0,004956845 | 14,83783657 |
| Fbxw4   | 0,001641741 | 10,34838694 |
| Fcho2   | 0,01304067  | 13,56650785 |
| Flot2   | 0,001559024 | 22,85469245 |
| Gab1    | 0,000745502 | 10,88356277 |

|         |             |             |
|---------|-------------|-------------|
| Gapvd1  | 0,001477674 | 23,72063704 |
| Gas6    | 0,000788084 | 11,26188368 |
| Gbas    | 0,000216482 | 33,96662569 |
| Gbf1    | 0,004217147 | 12,49705716 |
| Gja1    | 0,004757617 | 13,58229154 |
| Gmcl1   | 0,000104169 | 11,7866996  |
| Gna12   | 3,14655E-05 | 67,57961376 |
| Gns     | 0,005321713 | 27,16935761 |
| Golga4  | 7,35722E-05 | 34,21677775 |
| Gpam    | 0,000744526 | 22,63013052 |
| Gpr116  | 0,000140207 | 10,30373507 |
| Grk5    | 0,000201126 | 13,0766596  |
| Gsn     | 0,000444621 | 26,83864628 |
| Gspt1   | 0,003247701 | 33,94253002 |
| Gtf3c1  | 0,027046379 | 10,18488757 |
| H2afy   | 0,000400251 | 10,550784   |
| Hba-a2  | 2,57738E-05 | 12,97466154 |
| Hbs1l   | 0,000181824 | 15,18860062 |
| Hdgf    | 5,63644E-05 | 20,68218566 |
| Hdgfrp2 | 0,005069079 | 19,16121448 |
| Hdlbp   | 0,000105784 | 194,8942139 |
| Hnrnp1  | 0,000227103 | 36,48405548 |
| Hnrnp1  | 0,00021706  | 20,68093418 |
| Hspa9   | 0,00035797  | 10,49925459 |
| Il10rb  | 8,109E-05   | 16,27563019 |
| Impa1   | 0,002341459 | 11,73366253 |
| Ipo5    | 0,003425824 | 11,81630856 |
| Itgb1   | 0,000462383 | 87,94747787 |
| Ivd     | 0,000153865 | 10,52502205 |
| Kcnp2   | 0,000853735 | 13,32989028 |
| Kctd9   | 0,001566204 | 27,55694877 |
| Kdm1b   | 0,002731403 | 10,61342139 |
| Kif16b  | 0,000255956 | 35,45975099 |
| Kpna1   | 0,008243067 | 17,84950734 |
| Lemd3   | 0,000150823 | 13,09381867 |
| Lhfp    | 0,000233585 | 23,74089058 |
| Limd1   | 0,000614375 | 12,65934188 |
| Lrpprc  | 0,002478513 | 22,63791133 |
| Lrrc2   | 0,001084912 | 12,04946135 |
| Lrrfip2 | 0,009649554 | 10,36548093 |
| Man1c1  | 0,001099435 | 17,07991452 |
| Mcf2d   | 0,000253562 | 15,87184735 |
| Meis2   | 0,000710042 | 7,514417114 |
| Mfn2    | 0,000341302 | 16,07946834 |
| Mknk2   | 0,004451539 | 14,92024841 |

|         |             |             |
|---------|-------------|-------------|
| Mtor    | 0,001913992 | 6,865978311 |
| Mybpc3  | 4,46256E-05 | 100,8929879 |
| Nap114  | 0,00107747  | 14,04586433 |
| Nbr1    | 0,00051085  | 29,14596977 |
| Ndrq2   | 1,4613E-05  | 29,05827184 |
| Nedd4   | 1,00138E-05 | 14,82787034 |
| Nek9    | 0,00077353  | 12,05029951 |
| Nfe2l2  | 0,00051056  | 11,13959479 |
| Nid1    | 4,28698E-05 | 15,986655   |
| Nop2    | 0,001075354 | 10,75355074 |
| Nploc4  | 0,019859953 | 10,13963735 |
| Npr2    | 0,007077947 | 12,67156623 |
| Nqo1    | 0,003312753 | 13,3287631  |
| Nup93   | 0,001277829 | 10,2546749  |
| Ogdh    | 0,000624526 | 50,11253448 |
| Osbpl9  | 8,52387E-05 | 41,30718237 |
| Ostm1   | 0,00755069  | 12,47577989 |
| P4ha1   | 0,000307651 | 49,63564552 |
| Pabpc1  | 0,000113612 | 23,33800038 |
| Pcnt    | 0,000757784 | 16,00057893 |
| Pdcd7   | 0,002459516 | 12,89053065 |
| Pde4a   | 0,000632228 | 10,15468231 |
| Pecam1  | 0,00063725  | 10,10208373 |
| Pfn2    | 0,000259025 | 10,29655272 |
| Phtf2   | 0,001267849 | 16,87241698 |
| Pip5k1b | 0,00088603  | 11,30926567 |
| Pitpnb  | 0,000465497 | 11,0318883  |
| Plekha3 | 0,000175749 | 10,65349429 |
| Plin3   | 0,000632742 | 23,80524381 |
| Plk2    | 0,000651124 | 10,6472238  |
| Pnrc2   | 8,07038E-05 | 36,87491963 |
| Poglut1 | 0,002045177 | 14,93528539 |
| Ppig    | 1,39452E-05 | 15,80543514 |
| Ppil1   | 0,000120386 | 26,71874982 |
| Ppp1r8  | 0,000212018 | 11,58699012 |
| Ppp2r1a | 0,000411018 | 32,52013858 |
| Ppp3r1  | 0,001031523 | 22,15290128 |
| Ppp6r3  | 0,000754381 | 13,53915551 |
| Prkaa2  | 0,00202781  | 16,87456609 |
| Prkab1  | 0,00010437  | 11,45132791 |
| Prkaca  | 0,000175228 | 26,14050034 |
| Psap    | 9,04259E-05 | 15,73310482 |
| Ptbp2   | 0,000788301 | 10,8791403  |
| Ptp4a3  | 0,000457989 | 10,86221297 |
| Ptplad1 | 3,00574E-05 | 12,08623087 |

|         |             |             |
|---------|-------------|-------------|
| Ptpn12  | 0,00128104  | 12,68952974 |
| Ptpra   | 0,000594321 | 10,03728479 |
| Pygb    | 0,000272386 | 20,0571157  |
| Qk      | 5,49823E-05 | 22,16162783 |
| Rab12   | 0,000225852 | 73,71341285 |
| Rab18   | 0,002872983 | 56,66138259 |
| Rbl2    | 0,004371049 | 24,02031807 |
| Rbm22   | 0,009346897 | 10,39801798 |
| Rdx     | 0,000794098 | 47,34289914 |
| Rftn1   | 0,002772576 | 23,64484616 |
| Rpa1    | 0,000367671 | 16,56185655 |
| Rragc   | 0,002021981 | 57,27965905 |
| Rras2   | 0,002181742 | 11,05308969 |
| Rsad2   | 0,003582919 | 10,98703917 |
| Scn5a   | 0,002479289 | 10,9212872  |
| Serinc3 | 0,000337664 | 59,26992801 |
| Sf3a1   | 0,002727226 | 12,67797831 |
| Sipa1l2 | 0,036047307 | 14,97917487 |
| Slc27a1 | 0,001305203 | 76,44728444 |
| Slc2a4  | 0,000418931 | 90,96880523 |
| Slc35a5 | 0,003303153 | 13,75541966 |
| Slc35f5 | 0,000251782 | 134,6780101 |
| Slc41a3 | 0,001648888 | 21,03516749 |
| Smad4   | 0,000916134 | 18,38573823 |
| Smoc2   | 0,00095619  | 16,2858425  |
| Snx27   | 0,000279081 | 20,97613979 |
| Sorbs1  | 0,000362116 | 37,98839883 |
| Spop    | 0,007713447 | 66,32222029 |
| Srl     | 0,00012279  | 30,02641854 |
| Srsf1   | 0,000344176 | 25,53965267 |
| St3gal5 | 0,001434082 | 11,56864908 |
| Stard7  | 0,000354167 | 34,83416799 |
| Stat3   | 9,80807E-05 | 20,53296265 |
| Stip1   | 0,001026156 | 15,51410429 |
| Stk24   | 0,000249265 | 47,80400048 |
| Strn3   | 0,000724033 | 62,95439524 |
| Stx12   | 0,000284974 | 12,09395156 |
| Svil    | 0,002679208 | 24,81322241 |
| Tarsl2  | 0,001153426 | 10,28001525 |
| Tbk1    | 0,001644334 | 14,32187723 |
| Tex2    | 0,000370307 | 16,28865245 |
| Tjp1    | 0,000182526 | 10,14172285 |
| Tm9sf3  | 3,06678E-05 | 23,05582684 |
| Tmem165 | 0,001539312 | 12,97909332 |
| Tmem50b | 0,001609145 | 19,31957028 |

|         |             |             |
|---------|-------------|-------------|
| Top1    | 0,002762039 | 20,39952706 |
| Tsc22d4 | 0,002290293 | 11,27983258 |
| Uba2    | 0,003556512 | 10,66045603 |
| Ube2d1  | 0,000122634 | 14,924873   |
| Ube2w   | 0,000213766 | 16,60721786 |
| Unc45b  | 0,000245605 | 40,90894282 |
| Usp4    | 0,000126441 | 26,79379444 |
| Vapb    | 0,003434344 | 12,98048335 |
| Wdr5    | 0,002128075 | 20,24138635 |
| Wsb1    | 0,000231005 | 50,16556869 |
| Yars    | 0,002201753 | 11,35377538 |
| Ypel5   | 0,000540469 | 11,21804795 |
| Ywhae   | 0,000316369 | 31,07580804 |
| Zbtb20  | 0,002213139 | 11,58264429 |
| Zmym5   | 0,004863197 | 10,87247774 |



Table S3. Pathway analysis of downregulated, H3K9me2-enriched genes.

| Pathway Name                                    | No of reference genes in category | Entrez Gene Ids                                                                                                                                                   | Expected number of genes in category | Ratio of enrichment | Raw P-values | Adjusted P-values |
|-------------------------------------------------|-----------------------------------|-------------------------------------------------------------------------------------------------------------------------------------------------------------------|--------------------------------------|---------------------|--------------|-------------------|
| Insulin signaling pathway                       | 137                               | 108079<br>53413<br>20411<br>19079<br>17347<br>14252<br>110078<br>18747<br>12315<br>20528                                                                          | 0,56                                 | 17,97               | 2,94E-10     | 2,09E-08          |
| Regulation of actin cytoskeleton                | 216                               | 60595<br>227753<br>16412<br>66922<br>18719<br>19684<br>14673<br>12632<br>18645<br>11472                                                                           | 0,88                                 | 11,4                | 2,40E-08     | 8,52E-07          |
| Adipocytokine signaling pathway                 | 68                                | 108079<br>72674<br>14081<br>19079<br>20848<br>20528                                                                                                               | 0,28                                 | 21,73               | 3,73E-07     | 8,83E-06          |
| Arrhythmogenic right ventricular cardiomyopathy | 74                                | 60595<br>14609<br>16412<br>12385<br>11472<br>12558                                                                                                                | 0,3                                  | 19,96               | 6,19E-07     | 9,53E-06          |
| Adherens junction                               | 75                                | 60595<br>17128<br>20411<br>12385<br>21872<br>11472                                                                                                                | 0,3                                  | 19,7                | 6,71E-07     | 9,53E-06          |
| Tight junction                                  | 137                               | 60595<br>12385<br>66922<br>21872<br>13043<br>51792<br>11472                                                                                                       | 0,56                                 | 12,58               | 1,64E-06     | 1,94E-05          |
| Metabolic pathways                              | 1184                              | 18451<br>75612<br>14732<br>20454<br>14081<br>12359<br>11975<br>51797<br>230815<br>104776<br>18293<br>18719<br>55980<br>11364<br>69923<br>212647<br>60525<br>56357 | 4,81                                 | 3,74                | 2,07E-06     | 2,10E-05          |
| Leukocyte transendothelial migration            | 120                               | 60595<br>16412<br>12385<br>18613<br>11855                                                                                                                         | 0,49                                 | 12,31               | 1,05E-05     | 9,32E-05          |

|                                |     |                                                     |      |       |          |       |
|--------------------------------|-----|-----------------------------------------------------|------|-------|----------|-------|
|                                |     | 11472                                               |      |       |          |       |
| Ubiquitin mediated proteolysis | 140 | 17999<br>50995<br>99375<br>216080<br>66799<br>12211 | 0,57 | 10,55 | 2,51E-05 | 2E-04 |
| mRNA surveillance pathway      | 93  | 225363<br>56422<br>18458<br>14852<br>51792          | 0,38 | 13,24 | 4,11E-05 | 3E-04 |

**Figure S1. Levels of H3K4me3 and H3K27me3 are unaltered in cardiac biopsies from IPC and sham animals.** Western blot analysis of histone modifications in cardiac biopsies from the area at risk (AAR) and remote myocardium (RM) from animals (n=3) subjected to ischemic preconditioning or sham controls. Two-way ANOVA with Bonferroni post hoc analysis was used to test the effect of treatment but revealed no statistically significant changes.

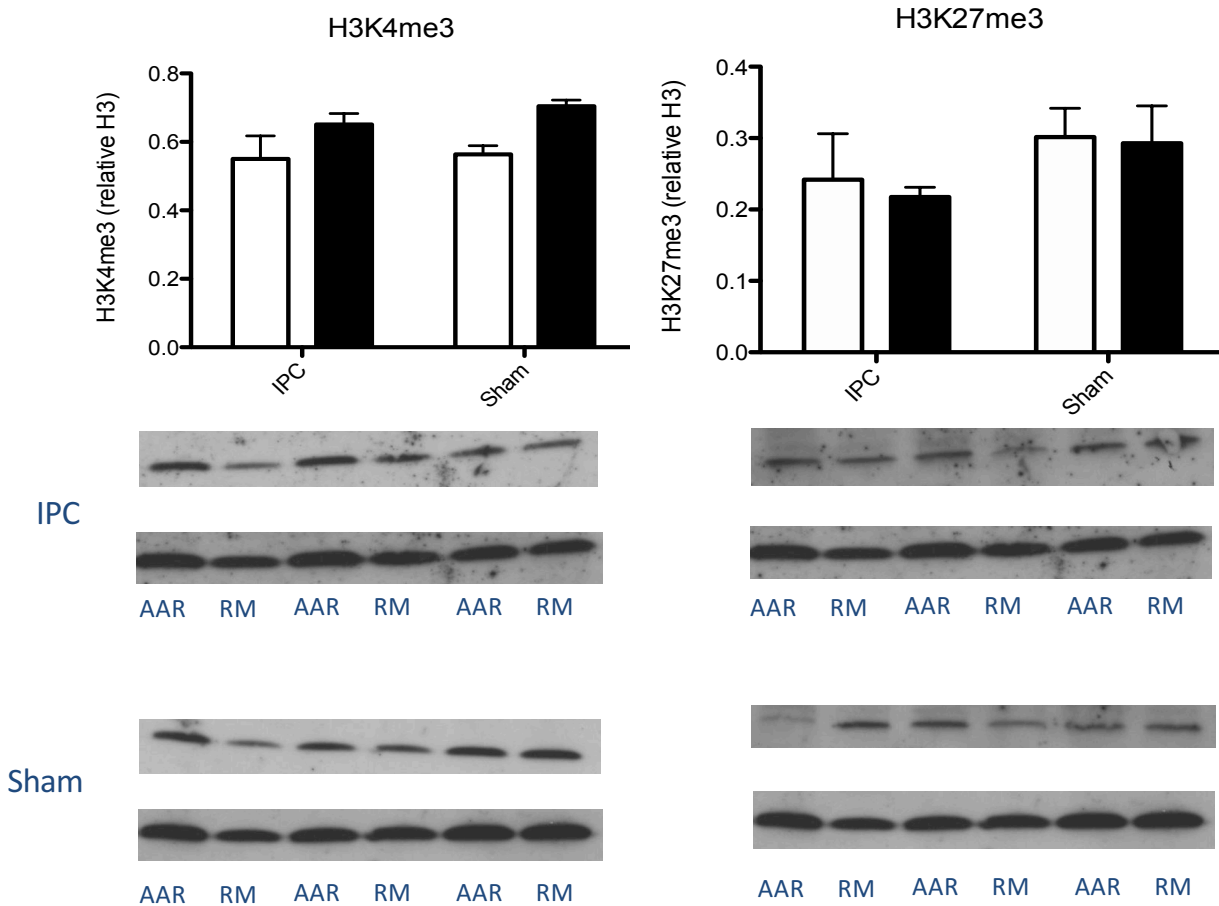

**Figure S2. G9a levels are unaltered in cardiac biopsies from IPC mice.** Western blot analysis of cardiac biopsies from the area at risk and remote myocardium of IPC mice (n=3) revealed no significant difference in G9a levels in the area at risk.

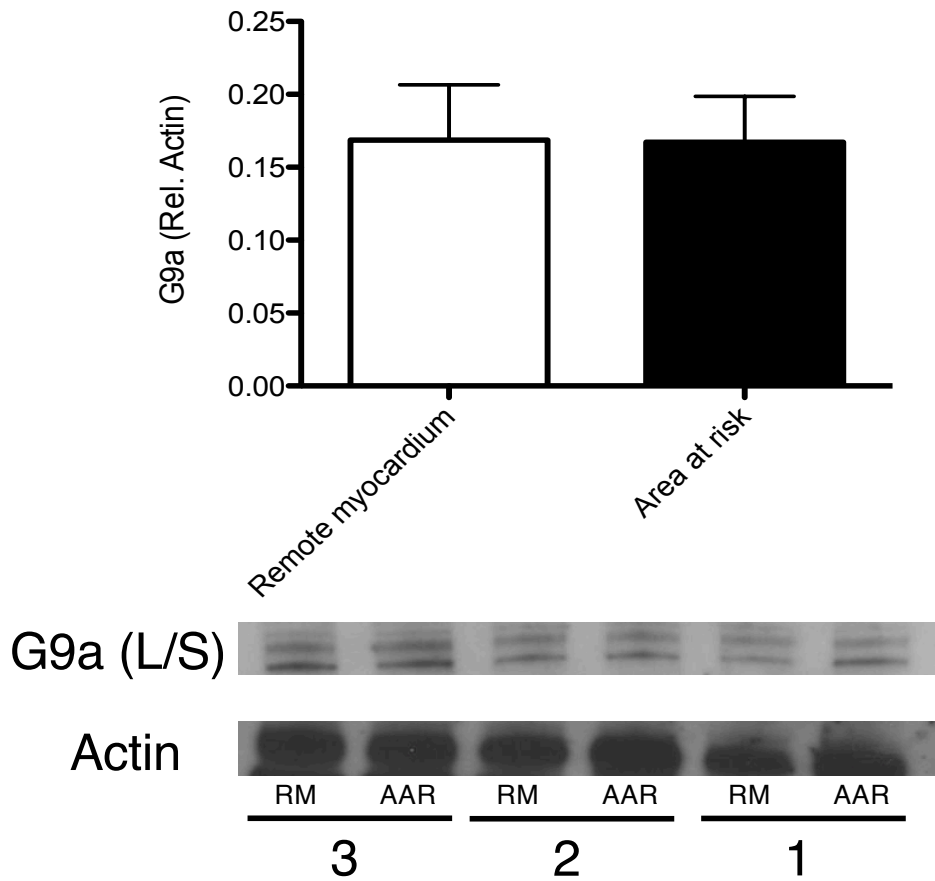

**Figure S3. H3K9me2 heat map.** Genes that were both enriched in H3K9me2 and transcriptionally repressed were identified (n=236). Differentially enriched peaks within those genes were calculated using EdgeR and a heat map based on the read number for those peaks was generated using MicroScope.

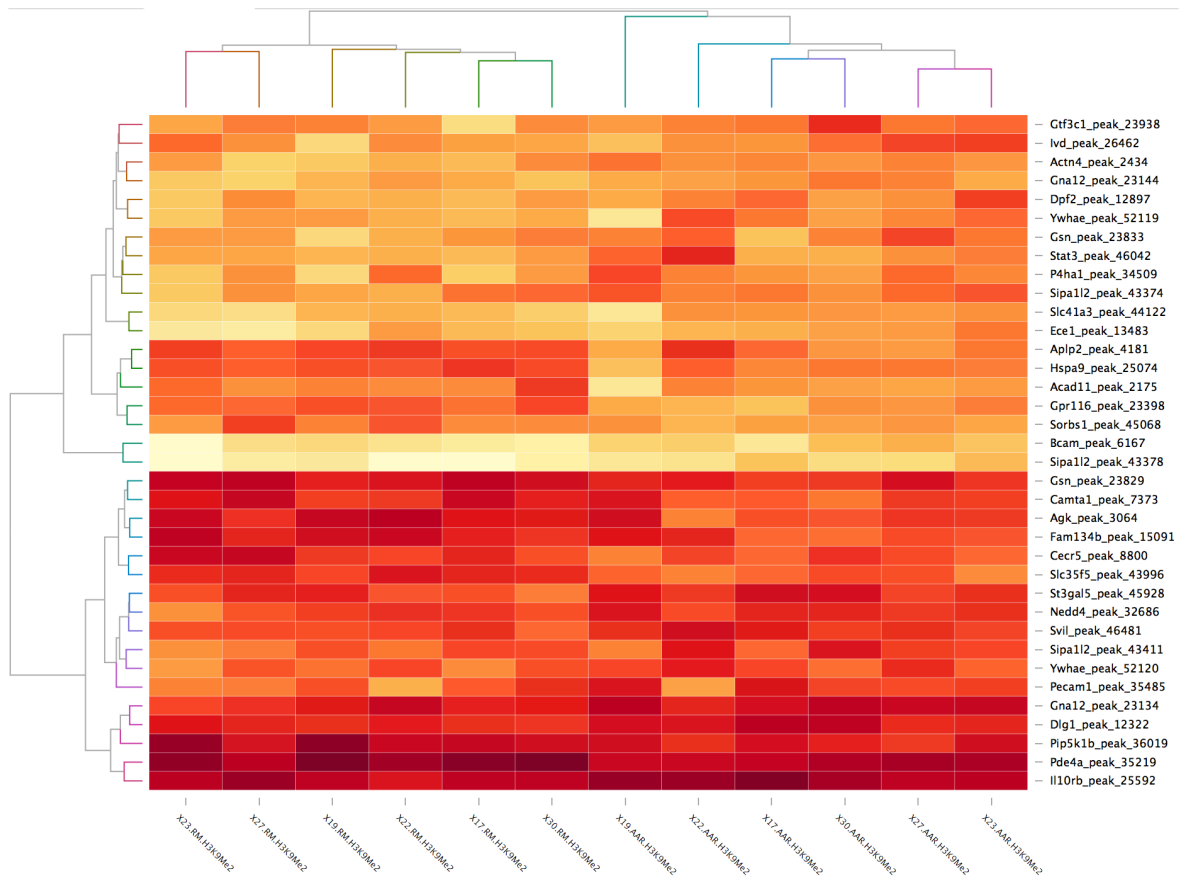

**Figure S4. Controls for the H3K9me2 ChIP-PCR.** As a control for the H3K9me2 ChIP, enrichment of H3K9me2 at the MyoD promoter and lack of H3K9me2 at the Gapdh promoter was assessed with ChIP-qPCR on cardiac biopsies from sham mice (n=3). As a negative control, an IgG IP was performed on the same samples.

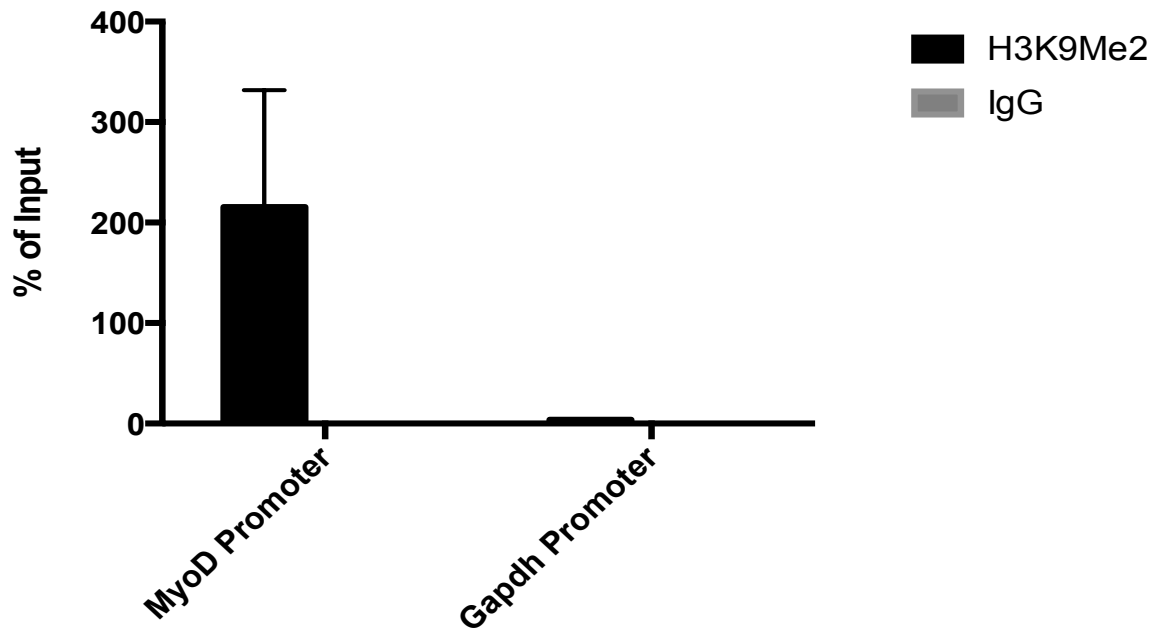

Supplement: JAH3-5-e004076-s001.pdf [file JAH3-5-e004076-s001.pdf]
